# Supplementary material for: MiRNA-21 functions in ionizing radiation-induced epithelium-to-mesenchymal transition (EMT) by downregulating PTEN
Source: Royal Society of Chemistry journal article supplement (doi:10.1039/c9tx00019d), 2019-01-01

### Supplementary Figure S1

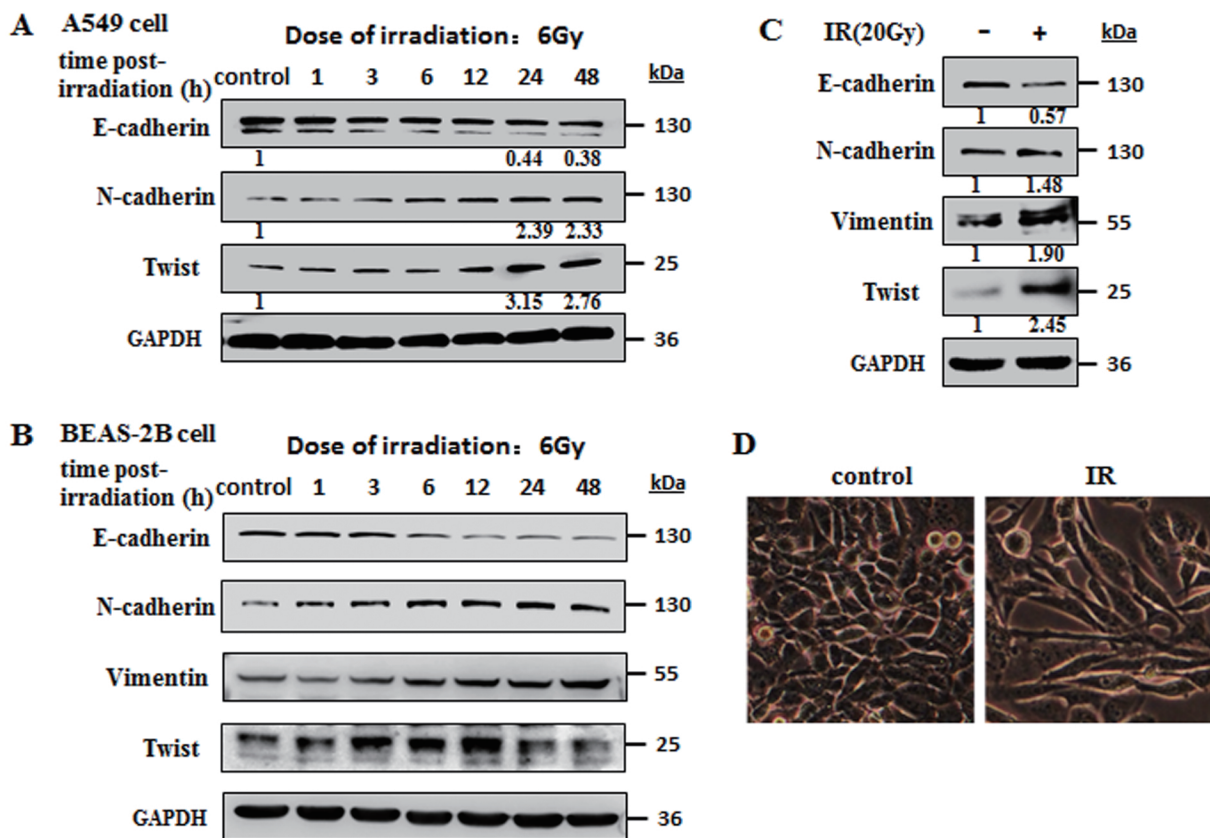

Supplementary Figure S2

**Control**

**miR-21 mimic**

**miR-21 inhibitor**

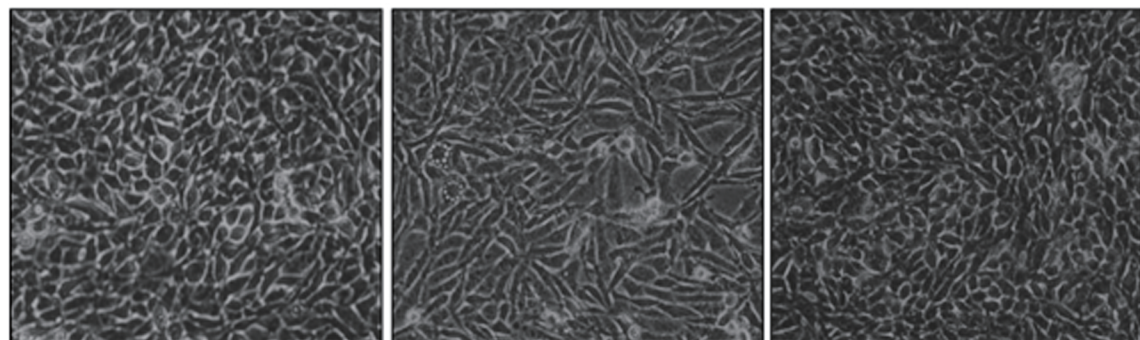

200×

Supplementary Figure S3

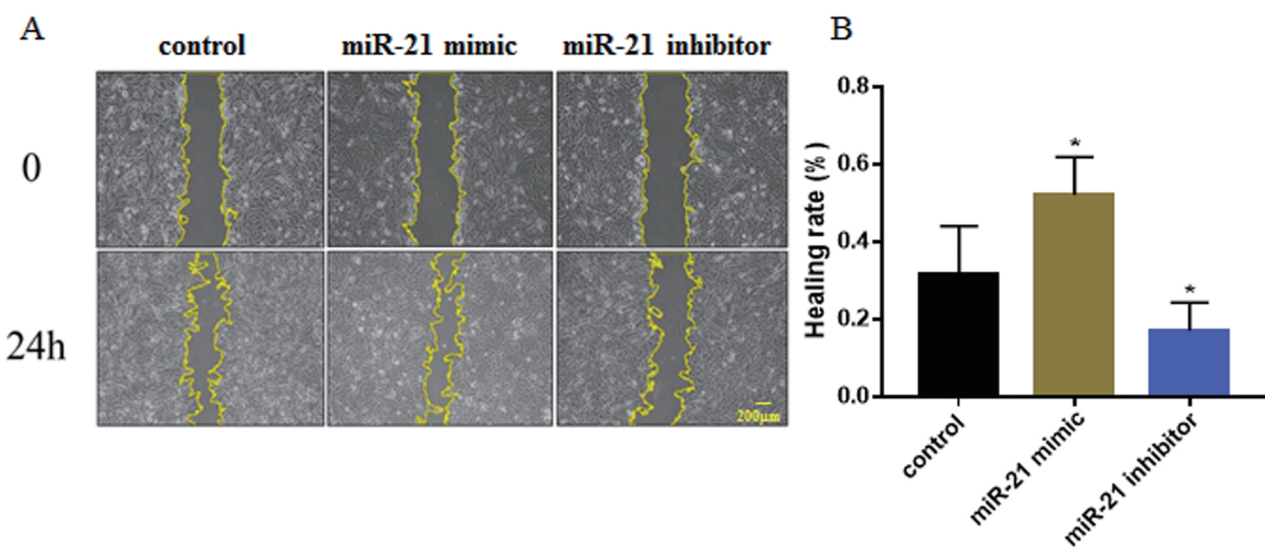

Supplement: c9tx00019d1.pdf [file c9tx00019d1.pdf]
